# Supplementary material
Source: Springer Nature journal article supplement (https://www.springermedizin.de/resource/supplementary/12887_2011_625_MOESM2_ESM.pdf/9475776)

**A**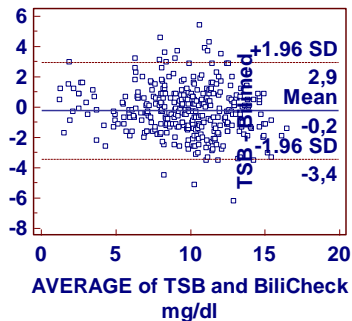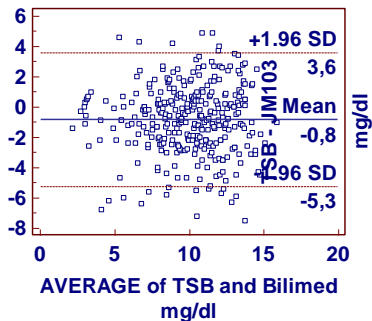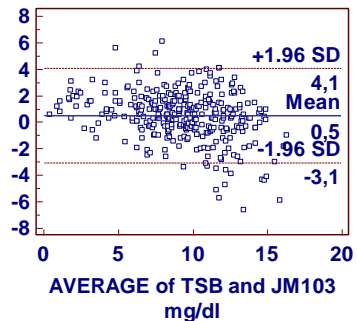**B**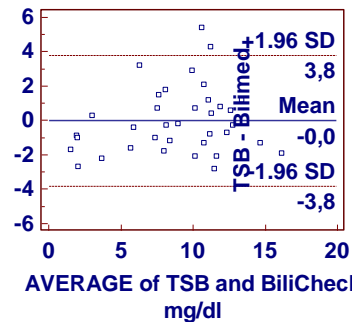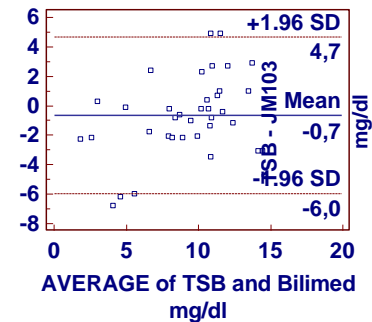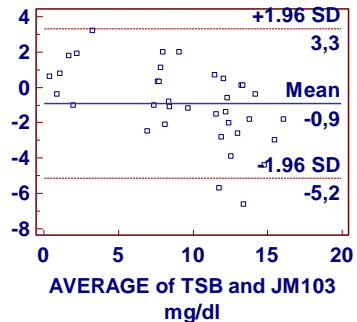

Supplement: MOESM2 [file 9475776]
